# Supplementary material for: Sol–gel synthesis of nanocrystal-constructed hierarchically porous TiO2based composites for lithium ion batteries
Source: Royal Society of Chemistry journal article supplement (doi:10.1039/c5ra03491d), 2015-01-01
Supplement: c5ra03491d1.pdf [file c5ra03491d1.pdf]

# Supporting Information

## Sol-gel synthesis of nanocrystals-constructed hierarchically porous

### TiO<sub>2</sub> based composites for lithium ion batteries

Wenjun Zhu,<sup>a</sup> Hui Yang,<sup>a</sup> Kazuki Nakanishi,<sup>b</sup> Kazuyoshi Kanamori,<sup>b</sup> Xingzhong Guo<sup>\*a</sup>

<sup>a</sup>School of Materials Science and Engineering, Zhejiang University, 38 Zheda Road, Xihu District, Hangzhou 310027, China

<sup>b</sup>Department of Chemistry, Graduate School of Science, Kyoto University, Kitashirakawa, Sakyo-ku, Kyoto 606-8502, Japan.

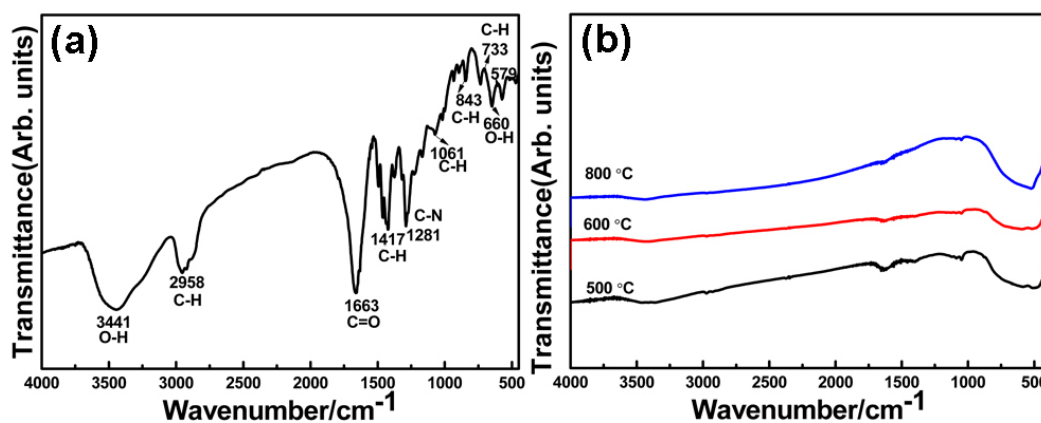

**Fig. S1** FT-IR spectra of pure PVP (a) and TiO<sub>2</sub>/C samples (b) calcined at different temperatures.

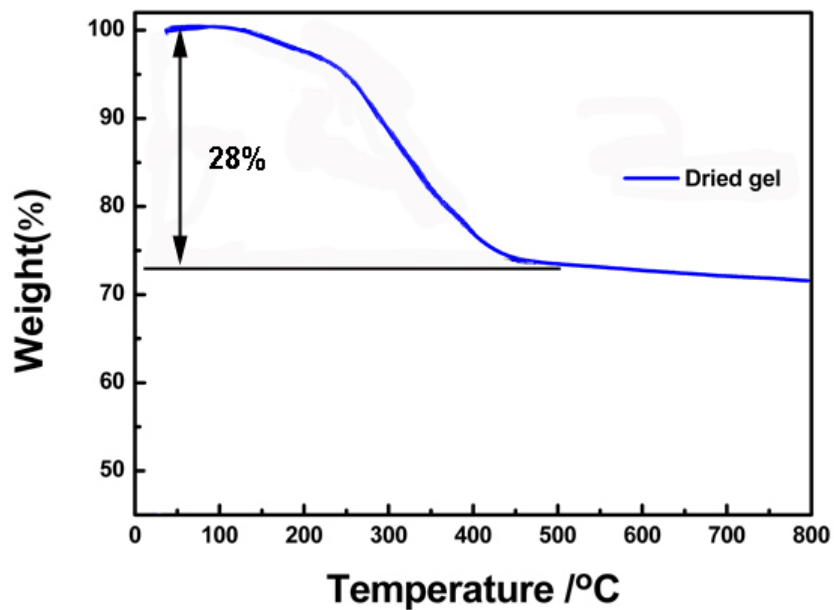

Fig. S2 TGA curve of dried gel in N<sub>2</sub> atmosphere.

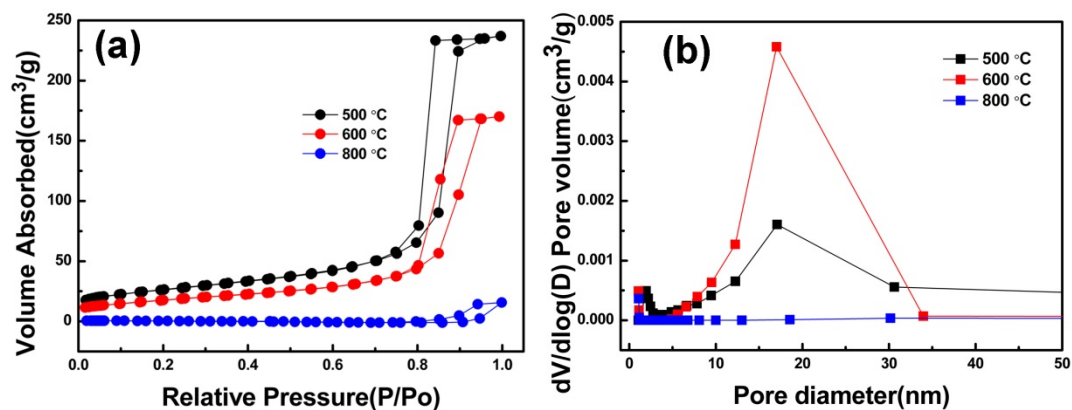

Fig. S3 Nitrogen adsorption-desorption isotherms (a) and pore size distributions curves (b) of pure TiO<sub>2</sub>.

| Sample              | Calcination Temperature<br>(°C) | O 1s   |        | Ti 2p                |                      |
|---------------------|---------------------------------|--------|--------|----------------------|----------------------|
|                     |                                 | Ti-O   | OH     | Ti 2p <sub>1/2</sub> | Ti 2p <sub>3/2</sub> |
| TiO <sub>2</sub>    | 500                             | 530.54 | 532.18 | 464.98               | 459.26               |
| TiO <sub>2</sub>    | 600                             | 530.38 |        | 464.92               | 459.12               |
| TiO <sub>2</sub>    | 800                             | 530.23 |        | 464.38               | 458.75               |
| TiO <sub>2</sub> /C | 500                             | 530.45 |        | 464.78               | 459.15               |
| TiO <sub>2</sub> /C | 600                             | 530.40 |        | 464.65               | 459.12               |
| TiO <sub>2</sub> /C | 800                             | 530.16 |        | 464.38               | 458.68               |

**Table S1** XPS core level binding energies of various elements (Ti, O, and C) of pure TiO<sub>2</sub> and TiO<sub>2</sub>/C composite calcined at different temperatures.

| Sample           | Calcination      |          | S <sub>BET</sub> (m <sup>2</sup> /g) | V <sub>p</sub> (cm <sup>3</sup> /g) |
|------------------|------------------|----------|--------------------------------------|-------------------------------------|
|                  | Temperature (°C) | Time (h) |                                      |                                     |
| TiO <sub>2</sub> | 500              | 4        | 90                                   | 0.26                                |
| TiO <sub>2</sub> | 600              | 4        | 64                                   | 0.208                               |
| TiO <sub>2</sub> | 800              | 4        | 2.56                                 | 0.024                               |

**Table S2** Pore characteristics of pure TiO<sub>2</sub> calcined at different temperature.

| Sample                    | Voltage plateau (V) |           | Sample                      | Voltage plateau (V) |           |
|---------------------------|---------------------|-----------|-----------------------------|---------------------|-----------|
|                           | Charge              | Discharge |                             | Charge              | Discharge |
| TiO <sub>2</sub> , 500 °C | 1.92                | 1.71      | TiO <sub>2</sub> /C, 500 °C | 1.95                | 1.75      |
| TiO <sub>2</sub> , 600 °C | 2.00                | 1.70      | TiO <sub>2</sub> /C, 600 °C | 1.94                | 1.73      |
| TiO <sub>2</sub> , 800 °C | 2.02                | 1.66      | TiO <sub>2</sub> /C, 800 °C | 2.01                | 1.66      |

**Table S3** Voltage plateau for the charge-discharge cycles of pure TiO<sub>2</sub> and TiO<sub>2</sub>/C composite.

| Rate  | Voltage plateau (V) |           | Rate | Voltage plateau (V) |           |
|-------|---------------------|-----------|------|---------------------|-----------|
|       | Charge              | Discharge |      | Charge              | Discharge |
| 0.5 C | 2.0                 | 1.65      | 5 C  | 1.89                | 1.61      |
| 1 C   | 1.92                | 1.71      | 10 C | 1.91                | 1.59      |
| 3 C   | 1.90                | 1.64      | 20 C | 1.93                | ---       |

**Table S4** Voltage plateau at different rates of TiO<sub>2</sub>/C composite (500 °C).
